# Supplementary material for: mRNA-Based Nanomedicinal Products to Address Corneal Inflammation by Interleukin-10 Supplementation
Source: MDPI journal article supplement (doi:10.3390/pharmaceutics13091472), 2021-09-15
Supplement: s1 [file s1]

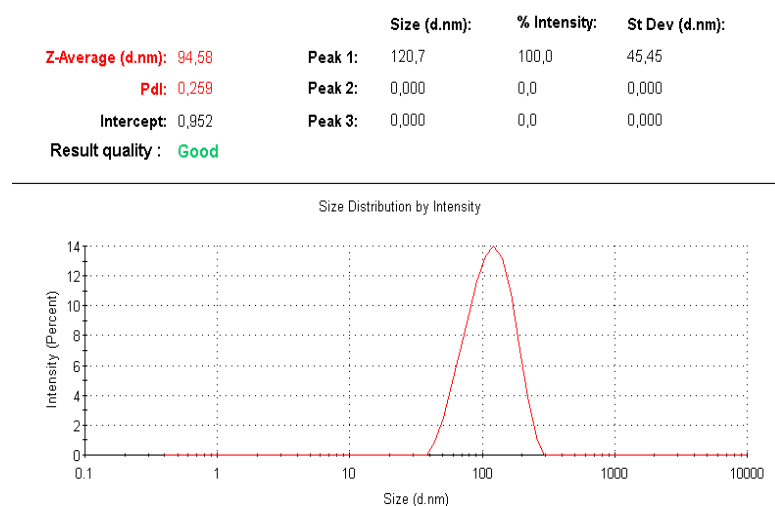

**Figure S1.** Particle Size Distribution Intensity Diagram of SLN<sub>HM</sub>.

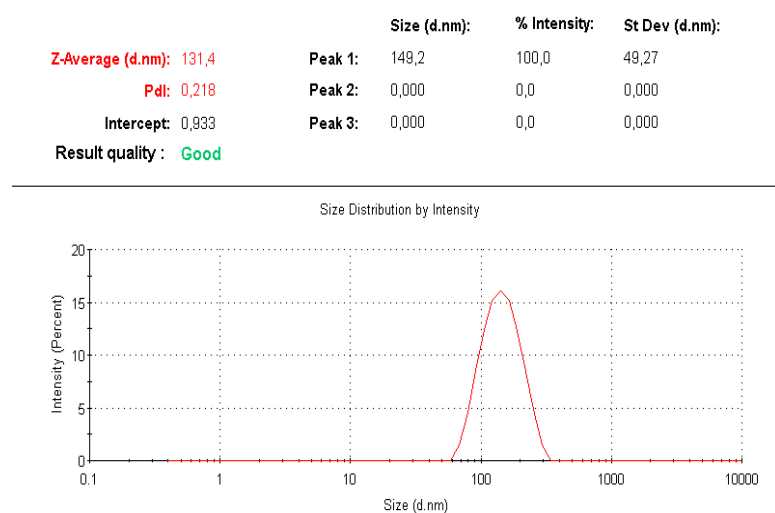

**Figure S2.** Particle Size Distribution Intensity Diagram of mRNA-HA-SLN<sub>HM</sub> bearing CleanCap<sup>™</sup> EGFP mRNA (5moU).

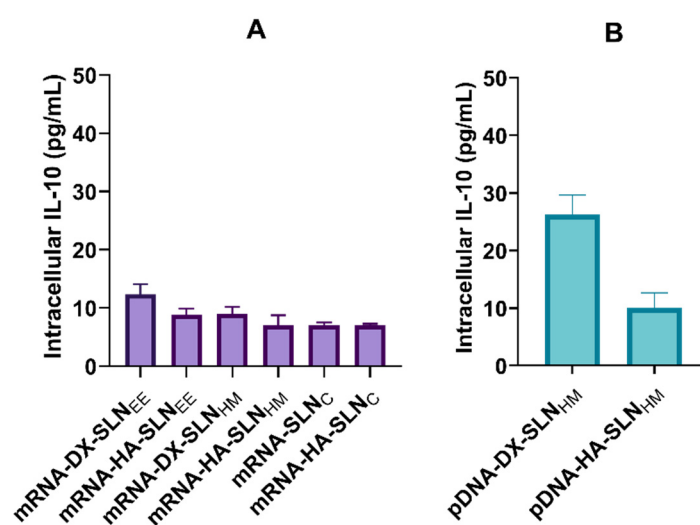

**Figure S3.** Intracellular levels of IL-10 in HCE-2 cells after the administration of SLN-based vectors bearing IL-10 mRNA and pUNO1-hIL10 plasmid. (A) Concentration of intracellular IL-10 48 h after the administration of mRNA-based vectors. (B) Concentration of intracellular IL-10 72 h after the administration of pDNA-based vectors. DX: dextran; HA: hyaluronic acid; SLN<sub>EE</sub>: solid lipid nanoparticle prepared by emulsification-evaporation method; SLN<sub>HM</sub>: solid lipid nanoparticle prepared by hot-melt emulsification method; SLN<sub>C</sub>: solid lipid nanoparticle prepared by coacervation method.

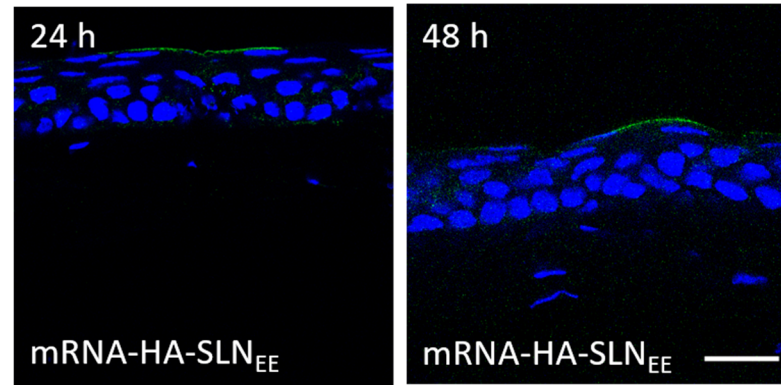

**Figure S4.** In vivo corneal transfection in wild type mice 24 h and 48 h after the administration of mRNA-HA-SLN<sub>EE</sub> with PVA (63×). Blue: nuclei stained with DAPI. Green: green fluorescent protein. Scale bar: 20  $\mu$ m. HA: hyaluronic acid; SLN<sub>EE</sub>: solid lipid nanoparticle prepared by emulsification-evaporation method.
