# Supplementary material for: mRNA-Based Nanomedicinal Products to Address Corneal Inflammation by Interleukin-10 Supplementation
Source: Pharmaceutics. 2021 Sep 15;13(9):1472. doi: 10.3390/pharmaceutics13091472 (PMC8466377; doi:10.3390/pharmaceutics13091472)
Supplement: Supplementary file 1 [file pharmaceutics-13-01472-s001.zip]

Archive with 5 entries (5 files):
- Figure S1.tif
- Figure S2.tif
- Figure S3.tif
- Figure S4.tif
- Supplementary Material.pdf
